# Supplementary material for: Self-assembled cathode induced by polarization for high-performance solid oxide fuel cell
Source: Royal Society of Chemistry journal article supplement (doi:10.1039/d2ta08525a), 2022-12-27
Supplement: d2ta08525a1.pdf [file d2ta08525a1.pdf]

## **Supporting information**

### **Self-assembled cathode induced by polarization for high-performance solid oxide fuel cell**

Xin Zhou,<sup>a</sup> Chenghao Yang,<sup>b</sup> Caichen Yang,<sup>b</sup> Jin Li<sup>a\*</sup> and Bo Chi<sup>b\*</sup>

a. Hubei Collaborative Innovation Center for Advanced Organic Chemical Materials, Ministry-of-Education Key Laboratory for the Green Preparation and Application of Functional Materials, Faculty of Materials Science and Engineering, Hubei University, Wuhan 430062, China

b. MOE Key Laboratory of Material Chemistry for Energy Conversion and Storage, School of Materials Science and Engineering, Huazhong University of Science and Technology, Wuhan 430074, China

\* Corresponding authors

Email address: jinli@hubu.edu.cn; chibo@hust.edu.cn

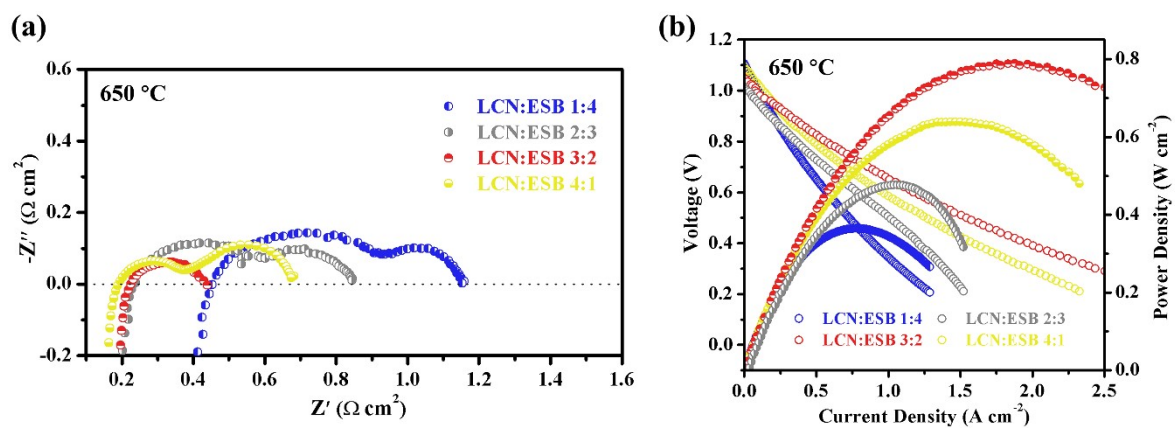

Figure. S1 Electrochemical performance of single cells after 2 h polarization: (a) EIS curves, (b) I-V-P curves.
